# Supplementary material
Source: PubMed Central journal article supplement (PMC4771325)

Table S1. Soil nutrient conditions at the Paal and Zolder sites.

| Site   | Sample | Total N (Kjehdahl)<br>mg / kg soil | NH4-N<br>mg N / kg soil | NO3-N + NO2-N<br>mg N / kg soil | Organic N<br>mg org N / kg soil | Ratio Organic/mineral N |
|--------|--------|------------------------------------|-------------------------|---------------------------------|---------------------------------|-------------------------|
| Paal   | 1      | 68                                 | 3.7                     | < 1                             | 64                              | 17                      |
|        | 2      | 188                                | 3.7                     | < 1                             | 184                             | 50                      |
|        | 3      | < 40                               | 3.7                     | < 1                             | -                               | -                       |
|        | 4      | 172                                | 4.7                     | < 1                             | 167                             | 36                      |
|        | 5      | 67                                 | 5.6                     | < 1                             | 61                              | 11                      |
| Zolder | 1      | 2640                               | 15.7                    | < 1                             | 2614                            | 166                     |
|        | 2      | 2942                               | 19                      | < 1                             | 2923                            | 154                     |
|        | 3      | 1168                               | 10.6                    | < 1                             | 1157                            | 109                     |
|        | 4      | 1495                               | 11.8                    | < 1                             | 1483                            | 126                     |
|        | 5      | 1182                               | 11.2                    | < 1                             | 1171                            | 105                     |

Figure S1. Correlation between the protease activity and the percentage of remaining protein in the medium at the end of the experiment for the 55 *Suillus* strains. The correlation between these two variables has been tested using the Kendall's tau index. The result of the correlation test, the equation of the correlation model and the calculated correlation coefficient are inserted in the figure.

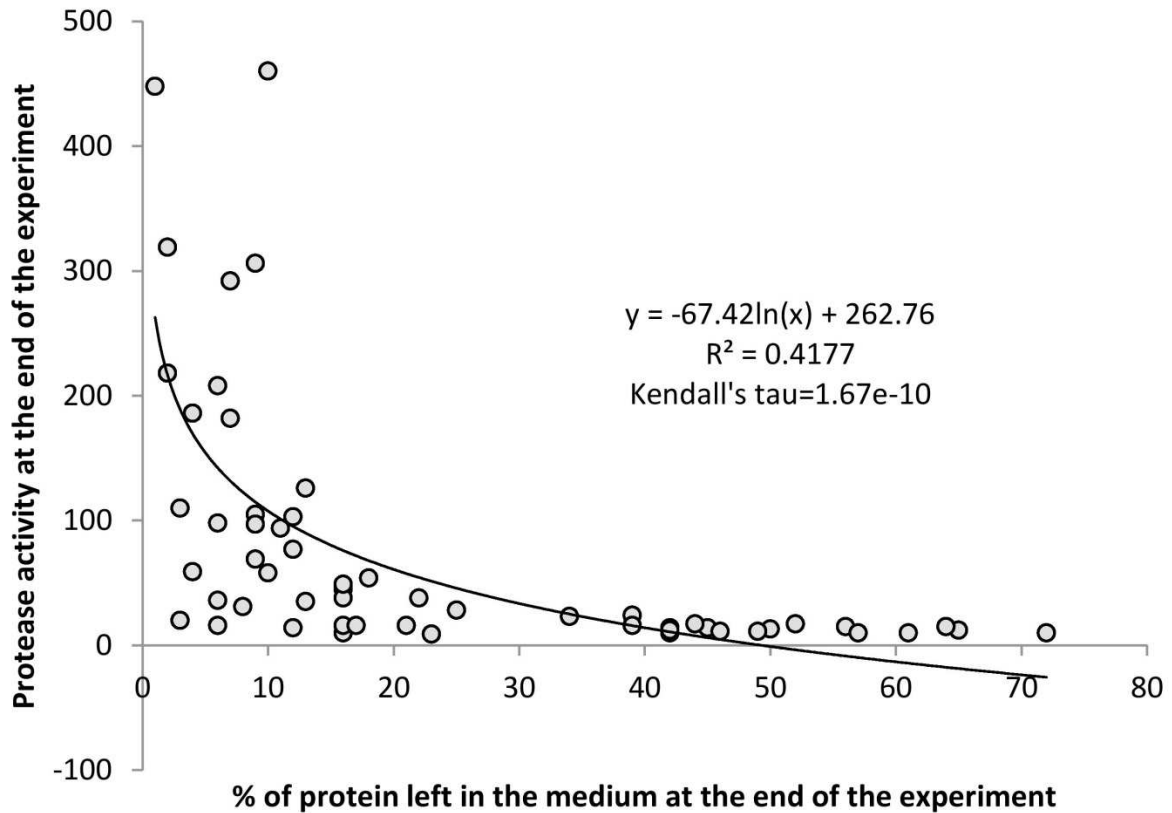

Figure S2. Log specific protease activity and log specific protein degradation of the 55 *Suillus* strains categorized by host genus. Different letters indicate significant differences among host genus means as determined by post-hoc Tukey HSD tests.

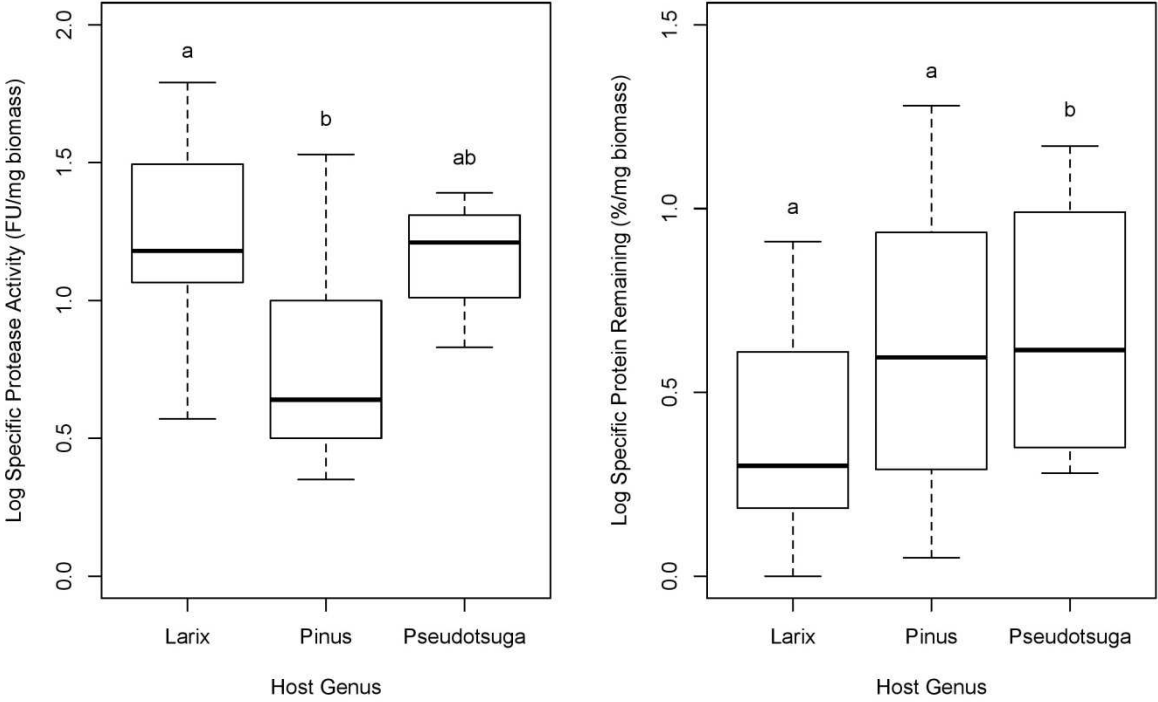

Supplement: AEM.03191-15_zam999116947so1.pdf [file AEM.03191-15_zam999116947so1.pdf]
